# Supplementary material
Source: PubMed Central journal article supplement (PMC11028040)
Supplement: 262_2017_2107_MOESM1_ESM.pdf [file 262_2017_2107_MOESM1_ESM.pdf]

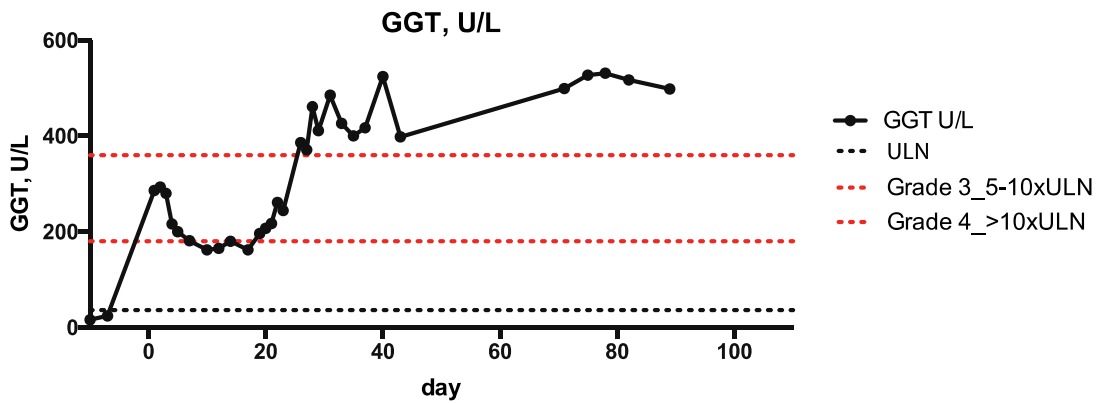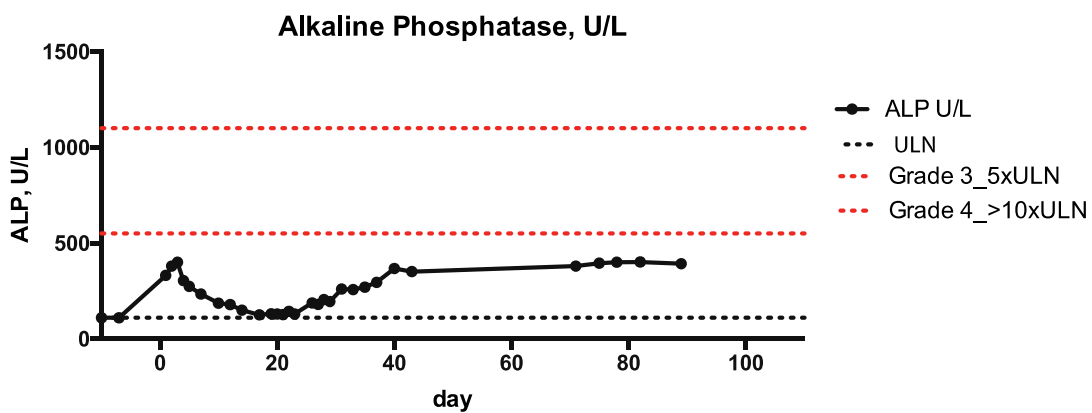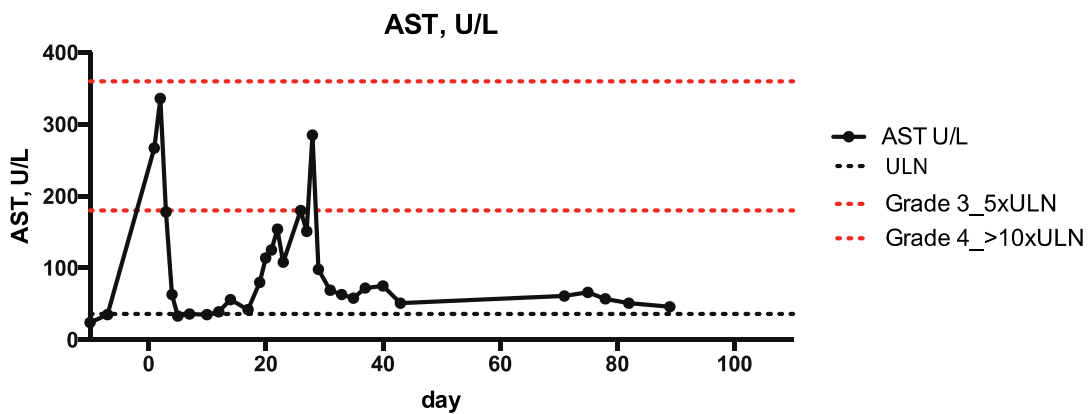

**Supplementary Figure S1.** Longitudinal levels of liver enzymes in the anti-PD-1 induced hepatitis patient. Day 0 represents the day on which ALT levels exceeded Grade3 levels. Levels defining grade 3 and 4 adverse reactions are shown in each graph. ULN: Upper limit of normal.

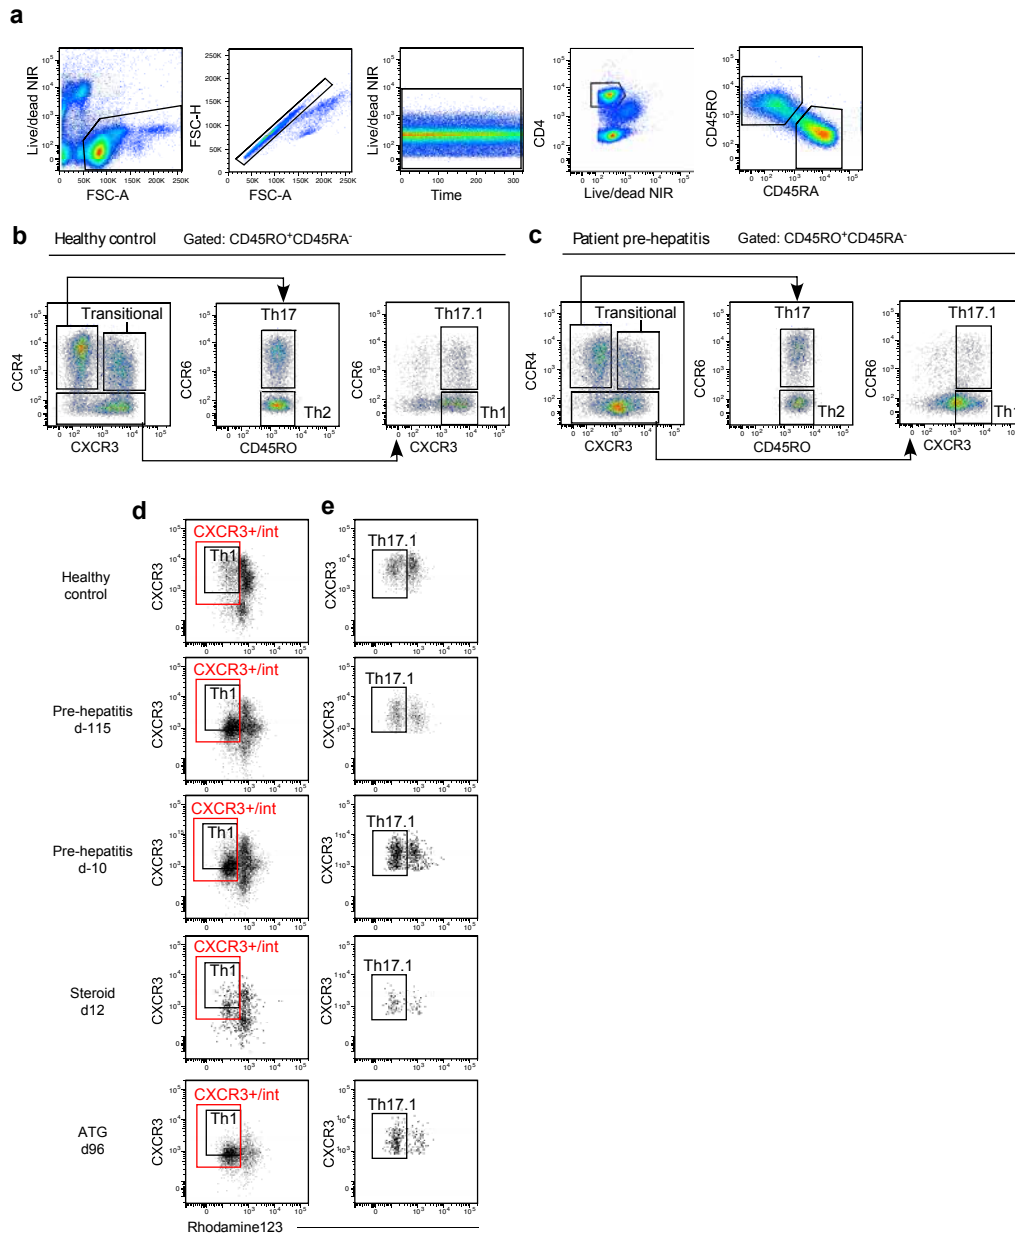

**Supplementary Figure S2.** (a) Flow cytometric gating strategy for the identification of effector/memory  $CD4^+CD45RO^+CD45RA^-$  and naïve  $CD4^+CD45RO^-CD45RA^+$  cells assayed for rhodamine 123 efflux as shown in Figure 4. (b, c) Representative plots of the gating strategy for the identification of Th subsets in normal controls (b) and the hepatitis patient (c). (d) Representative plots of CXCR3 expression by rhodamine effluxing cells within the  $CD4^+CD45RO^+CCR4^-CCR6^-$  subset. The conventional  $CXCR3^+$  Th1 gate is indicated in black, and the  $CXCR3^{+/int}$  ‘Th1-like’ gate is indicated in red. (e) Representative plots of CXCR3 expression by rhodamine effluxing cells within the  $CD4^+CD45RO^+CCR4^-CCR6^+$  subset. The  $CXCR3^+$  Th17.1 gate is indicated in black. Samples from the hepatitis patient are annotated relative to the day of ALT increase. d-115 and d-10, pre-hepatitis; d12, after corticosteroid only; d96, after ATG therapy.

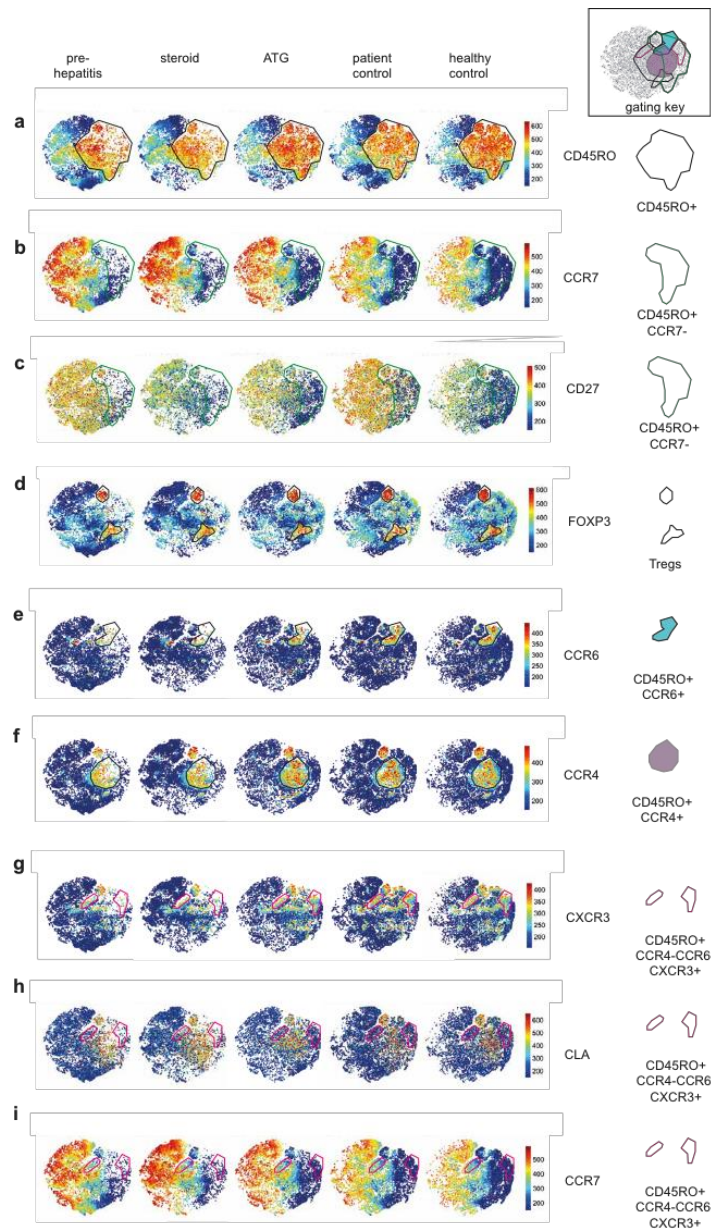

**Supplementary Figure S3.** Mass cytometric analysis of CD4<sup>+</sup> T cells from the experiment shown in Figure 3. A concatenated file of CD4<sup>+</sup> T cells from each sample was analyzed using the *t*-SNE clustering algorithm. Cells were clustered on expression of CD45RA, CD45RO, CCR7, FOXP3, CD127, CCR6, CCR4 and CXCR3. Representative plots show clustering of individual samples within the concatenated file, with individual gates shown in the gating key. **(a-i)** *t*-SNE plots colored for expression of individual markers. **(a)** CD45RO, with the gate indicating CD45RO<sup>+</sup> cells, **(b)** CCR7 (gate indicating CD45RO<sup>+</sup>CCR7<sup>-</sup> cells), **(c)** CD27 (gate indicating CD45RO<sup>+</sup>CCR7<sup>-</sup> cells), **(d)** FOXP3 (gate indicating Tregs, **(e)** CCR6 (gate indicating CCR6<sup>+</sup> cells within “conventional” CD45RO<sup>+</sup> cells excluding Tregs), **(f)** CCR4 (gate indicating CCR4<sup>+</sup> cells within “conventional” CD45RO<sup>+</sup> cells), **(g)** CXCR3 (gate indicating CXCR3<sup>+</sup> cells within “conventional” CD45RO<sup>+</sup>CCR6<sup>-</sup>CCR4<sup>-</sup> cells), **(h)** CLA (gate indicating CD45RO<sup>+</sup>CCR6<sup>-</sup>CCR4<sup>-</sup>CXCR3<sup>+</sup> cells), **(i)** CCR7 (gate indicating CD45RO<sup>+</sup>CCR6<sup>-</sup>CCR4<sup>-</sup>CXCR3<sup>+</sup> cells).

Supplementary Table S1 Mass cytometry antibody panel information

| Isotope/Fluorochrome | Antibody      | Antibody Clone | Antibody source |
|----------------------|---------------|----------------|-----------------|
| Surface stain        |               |                |                 |
| Pr141                | CD27          | M-T271         | BD Biosciences* |
| Nd142                | CD19          | H1B19          | Biolegend*      |
| Nd143                | CD45RA        | H1100          | Biolegend*      |
| Nd145                | CD4           | RPA T4         | BD Biosciences* |
| Nd146                | CD8A          | RPA-T8         | BD Biosciences* |
| Sm149                | CLA           | HECA-452       | Biolegend*      |
| Gd154                | CD196 (CCR6)  | 11A9           | BD Biosciences* |
| Gd158                | CD194 (CCR4)  | L291H4         | Biolegend*      |
| Tb159                | CD197 (CCR7)  | G043H7         | Biolegend*      |
| Dy163                | CD183 (CXCR3) | G025H7         | Biolegend*      |
| Er164                | CD45RO        | UCHL1          | Biolegend*      |
| Ho165                | CD127         | A019D5         | Biolegend*      |
| Tm169                | CD25          | 2A3            | BD Biosciences* |
| Er170                | CD3           | UCHT1          | BD Biosciences* |
| Yb172                | CD134 (OX40)  | ACT35          | BD Biosciences* |
| Yb174                | HLA-DR        | L243           | Biolegend*      |
| Intracellular stain  |               |                |                 |
| Dy162                | FoxP3         | PCH101         | eBioscience*    |
| Live/dead marker     |               |                |                 |
| Pt194/195            | Cisplatin     |                | Fluidigm        |

\*Mass cytometry antibody conjugation protocol was carried out by the Ramaciotti Facility for Human Systems Biology, Sydney, Australia. Antibodies, without any carrier proteins were purchased from companies specified and labeled with MaxPar X8 labeling reagent kits (Fluidigm) according to the manufacturer's instructions.
